# Supplementary material
Source: PubMed Central journal article supplement (PMC4127199)
Supplement: NIHMS616506-supplement-01.pdf [file NIHMS616506-supplement-01.pdf]

**Online Table:** Description of IMPACT Score and Allocation of Points by Variable

| <b>Covariates</b>                                              | <b>Points Assigned</b> |
|----------------------------------------------------------------|------------------------|
| <b>Age greater than 60</b>                                     | <b>3</b>               |
| <b>Bilirubin (serum)</b>                                       |                        |
| 0-0.99                                                         | 0                      |
| 1-1.99                                                         | 1                      |
| 2-3.99                                                         | 3                      |
| ≥4                                                             | 4                      |
| <b>Creatinine Clearance</b>                                    |                        |
| >50 ml/min                                                     | 0                      |
| 30-49 ml/min                                                   | 2                      |
| <30 ml/min                                                     | 5                      |
| <b>Dialysis between listing and transplant</b>                 | <b>4</b>               |
| <b>Female Sex</b>                                              | <b>3</b>               |
| <b>Heart Failure Etiology</b>                                  |                        |
| Idiopathic                                                     | 0                      |
| Ischemic                                                       | 2                      |
| Congenital                                                     | 5                      |
| Other                                                          | 1                      |
| <b>Infection</b>                                               | <b>3</b>               |
| <b>IABP</b>                                                    | <b>3</b>               |
| <b>Mechanical Ventilation prior to transplant</b>              | <b>5</b>               |
| <b>Race</b>                                                    |                        |
| Caucasian                                                      | 0                      |
| African American                                               | 3                      |
| Hispanic                                                       | 0                      |
| Other                                                          | 0                      |
| <b>Temporary circulatory support (ECMO/ExtraCorporeal VAD)</b> | <b>7</b>               |
| <b>Older generation pulsatile VAD</b>                          | <b>3</b>               |
| <b>New generation continuous VAD (excluding HMII)</b>          | <b>5</b>               |
| <b>Heartmate II</b>                                            | <b>0</b>               |
| <b>Total Points Possible</b>                                   | <b>50 points</b>       |
